# Supplementary material for: Cyclo-(l-Phe-l-Pro), a Quorum-Sensing Signal of Vibrio vulnificus, Induces Expression of Hydroperoxidase through a ToxR-LeuO-HU-RpoS Signaling Pathway To Confer Resistance against Oxidative Stress
Source: PubMed Central journal article supplement (PMC6105893; doi:10.1128/iai.00932-17), 2018-08-22
Supplement: zii999092521s1.pdf [file zii999092521s1.pdf]

**Table S1** Bacterial strains and plasmids used in this study.

| Strains or plasmids                        | Genotypes                                                                                                                        | Sources    |
|--------------------------------------------|----------------------------------------------------------------------------------------------------------------------------------|------------|
| <b>Strains</b>                             |                                                                                                                                  |            |
| <i>E. coli</i>                             |                                                                                                                                  |            |
| S17-1                                      | [C600::RP4-2 (Tc::Mu)(Km::Tn7) <i>thi pro</i><br><i>hsdRM</i> <sup>+</sup> <i>recA</i> , Tc <sup>r</sup>                         | (1)        |
| S17-1 $\lambda$ <i>pir</i>                 | S17-1 with $\lambda$ <i>pir</i> lysogen                                                                                          | (1)        |
| BL21(DE3)                                  | F <sup>-</sup> <i>ompT hsdSB</i> (r <sub>B</sub> <sup>-</sup> , m <sub>B</sub> <sup>-</sup> ) <i>gal dcm</i> (DE3)               | Novagen    |
| <i>V. vulnificus</i>                       |                                                                                                                                  |            |
| MO6-24/O                                   | Pathogenic clinical isolate                                                                                                      | (2)        |
| KPR101                                     | Derivative of MO6-24/O with a deletion in<br><i>rpoS</i>                                                                         | (3)        |
| $\Delta$ <i>leuO</i>                       | Derivative of MO6-24/O with a deletion in<br><i>leuO</i>                                                                         | (4)        |
| $\Delta$ <i>vhuAB</i>                      | Derivative of MO6-24/O with double in<br>frame deletions in <i>vhuAB</i>                                                         | This study |
| $\Delta$ <i>leuO</i> $\Delta$ <i>vhuAB</i> | Derivative of MO6-24/O with triple in frame<br>deletions in <i>vhuAB</i> and <i>leuO</i>                                         | This study |
| <b>Plasmids</b>                            |                                                                                                                                  |            |
| pDM4                                       | Suicide vector for allelic exchange, <i>sacB</i> ,<br>Cm <sup>r</sup>                                                            | (5)        |
| pDM- <i>vhuA</i> KO                        | pDM4 with the in frame 79 amino acid<br>deletion (bp +19 to +255 from the start<br>codon) of <i>vhuA</i> of <i>V. vulnificus</i> | This study |
| pDM- <i>vhuB</i> KO                        | pDM4 with the in frame 79 amino acid<br>deletion (bp +19 to +255 from the start<br>codon) of <i>vhuB</i> of <i>V. vulnificus</i> | This study |
| pRK415                                     | IncP <i>ori</i> , broad-host-range vector; <i>oriT</i> of<br>RP4, Tc <sup>r</sup>                                                | (6)        |

|                 |                                                                                           |            |
|-----------------|-------------------------------------------------------------------------------------------|------------|
| pRK-vhuAB       | pRK415 with <i>V. vulnificus</i> <i>vhuAB</i> operon with the promoter region             | This study |
| pMZtc           | pDM4 with the promoter-less <i>lacZ</i> gene for transcriptional fusion                   | This study |
| pRE1-leuO       | <i>leuO</i> expression vector                                                             | (4)        |
| pMZtc-katG      | pMZtc with the promoter region of <i>katG</i>                                             | This study |
| pMZtc-vhuA      | pMZtc with the promoter region of <i>vhuA</i>                                             | This study |
| pMZtc-vhuB      | pMZtc with the promoter region of <i>vhuB</i>                                             | This study |
| pMZtc-leuO      | pMZtc with the promoter region of <i>leuO</i>                                             | This study |
| pMZtc-rpoS      | pMZtc with the promoter region of <i>rpoS</i>                                             | This study |
| pRZtl-rpoS      | pRK415 vector with <i>rpoS-lacZ</i> fusion in-frame                                       | This study |
| pET14b          | Expression vector, N-terminal His-tag, Ap <sup>r</sup>                                    | Novagen    |
| pET-rpoS        | pET14b vector with <i>V. vulnificus</i> <i>rpoS</i> gene                                  | This study |
| pBBR1-MCS2      | Broad host range expression vector, Km <sup>r</sup>                                       | (7)        |
| pBBR12-vhuAB    | pBBR1-MCS2 with <i>V. vulnificus</i> <i>vhuAB</i> operon with the promoter region         | This study |
| pBBR12-leuO     | pBBR1-MCS2 with the <i>leuO</i> operon of <i>V. vulnificus</i>                            | This study |
| pBBR12-leuO-ara | pBBR-MCS2 vector with the <i>V. vulnificus</i> <i>leuO</i> under the <i>araC</i> promoter | This study |

## References

1. **Simon R, Priefer, U., Pühler, A.** 1983. A broad host range mobilization system for in vivo genetic engineering: transposon mutagenesis in gram negative bacteria. *Nature Biotechnol* **1**:784-791.
2. **Reddy GP, Hayat U, Abeygunawardana C, Fox C, Wright AC, Maneval DR, Jr., Bush CA, Morris JG, Jr.** 1992. Purification and determination of the structure of capsular polysaccharide of *Vibrio vulnificus* M06-24. *J Bacteriol* **174**:2620-2630.
3. **Park KJ, Kang MJ, Kim SH, Lee HJ, Lim JK, Choi SH, Park SJ, Lee KH.** 2004. Isolation and characterization of *rpoS* from a pathogenic bacterium, *Vibrio vulnificus*: role of sigma<sup>S</sup> in survival of

exponential-phase cells under oxidative stress. *J Bacteriol* **186**:3304-3312.

4. **Kim JA, Park JH, Lee MA, Lee HJ, Park SJ, Kim KS, Choi SH, Lee KH.** 2015. Stationary-phase induction of *vvpS* expression by three transcription factors: repression by *LeuO* and activation by *SmcR* and *CRP*. *Mol Microbiol* **97**:330-346.
5. **Milton DL, O'Toole R, Horstedt P, Wolf-Watz H.** 1996. Flagellin A is essential for the virulence of *Vibrio anguillarum*. *J Bacteriol* **178**:1310-1319.
6. **Keen NT, Tamaki S, Kobayashi D, Trollinger D.** 1988. Improved broad-host-range plasmids for DNA cloning in gram-negative bacteria. *Gene* **70**:191-197.
7. **Kovach ME, Elzer PH, Hill DS, Robertson GT, Farris MA, Roop RM, 2nd, Peterson KM.** 1995. Four new derivatives of the broad-host-range cloning vector pBBR1MCS, carrying different antibiotic-resistance cassettes. *Gene* **166**:175-176.

**Table S2** Primers used in this study.

| Name                                                           | Nucleotide sequence (5' to 3') <sup>a</sup> |
|----------------------------------------------------------------|---------------------------------------------|
| <b>Construction of a <i>vhuAB</i> in-frame deletion mutant</b> |                                             |
| <i>vhu</i> $\alpha$ -koF1                                      | GTACTCGAGGGGTCGACCAGACAAAGGGTGTTAGG         |
| <i>vhu</i> $\alpha$ -koB1                                      | CAATTAGTTTACTGAGGTCTTGTTCATTAGGTTTC         |
| <i>vhu</i> $\alpha$ -koF2                                      | CTAATGAACAAGACCTCAGTAAACTAATTGCTCTG         |
| <i>vhu</i> $\alpha$ -koB2                                      | TATCGATACCGTCGACAGTAACGTTTCTACTTCC          |
| <i>vhu</i> $\beta$ -koF1                                       | GTACTCGAGGGGTCGACACGGAAGTCGGTGGCGATT        |
| <i>vhu</i> $\beta$ -koB1                                       | GATTAGTTACAAGCAGTTTTTGTTCACTGTGATT          |
| <i>vhu</i> $\beta$ -koF2                                       | ACAGTGAACAAAAGTCTTGTAATAATCGCGATA           |
| <i>vhu</i> $\beta$ -koB2                                       | TATCGATACCGTCGACGAATCAGTTCACGACGCA          |
| <b>Construction of pMZtc</b>                                   |                                             |
| pDM4-lacZF                                                     | CGGGTAACCTGAGCTCATCGAGCAACATATTAATGAG       |
| pDM4-lacZB                                                     | AATCCCGGGAGAGCTCACATAATGGATTCCTTACG         |
| <b>Cloning of <i>vhuAB</i></b>                                 |                                             |
| pRK- <i>vhu</i> $\alpha$ -comF                                 | GACGGCCAGTGAATTCCTCAATCACATCTGCCG           |
| pRK- <i>vhu</i> $\alpha$ -comB                                 | TACCGAGCTCGAATTCGGTGCAGAGCAATTAGT           |
| pRK- <i>vhu</i> $\beta$ -comF                                  | TAGAGTCGACCTGCAGCAAAAATAAGTAAAA             |
| pRK- <i>vhu</i> $\beta$ -comB                                  | GCTTGCATGCCTGCAGTTCGGCTTTCACATCGCA          |
| pBBR12- <i>vhu</i> comF                                        | TAGAACTAGTGGATCCCTCAATCACATCTGCCGTG         |
| pBBR12- <i>vhu</i> comB                                        | GCTTGATATCGAATTCAAACGGGTTTGATTGAAC          |
| <b>Construction of <i>lacZ</i> fusion</b>                      |                                             |
| <i>katG</i> -tcF                                               | CCTTCTAGATAGATCTCGAGTTTTAGTCACGAC           |
| <i>katG</i> -tcB                                               | CCCGCATGCAAGATCTGCATTACTGGGCATTGGCC         |
| <i>vhu</i> $\alpha$ -scF                                       | CCTTCTAGATAGATCTTGTGCACCCGCTGTTCGAG         |
| <i>vhu</i> $\alpha$ -scB                                       | CCCGCA TGCAAGATCTTCAAGAGCAGCTTTCGCT         |
| <i>vhu</i> $\beta$ -scF                                        | CCTTCTAGATAGATCTAGCCTAACGGGTAACCC           |
| <i>vhu</i> $\beta$ -scB                                        | CCCGCATGCAAGATCTAGAGCACGACCTGCTG            |

|              |                                                |
|--------------|------------------------------------------------|
| RpoS-scF     | CCTTCTAGA <u>AGATCT</u> AGCCAAGTGGCAGTGGCCA    |
| RpoS-sctcB   | CCCGCATGCA <u>AGATCT</u> GATTAACATCGAAATCT     |
| leuO-scF     | <u>CTCGAGTTCGGCGTGGGCTG</u>                    |
| leuO-scB     | <u>TCTAGACTGTGACATGCCTA</u>                    |
| pRZtl-rpoSF  | CTAGAGTCGAC <u>CTGCAGACT</u> CCCAAACCAACACCGAC |
| pRZtl-rpoSB  | CGTTGTAAAACGACGGGCGTTGAAACCTCTGGGTCAG          |
| rpoS-lacZtlF | CCAGAGGTTTCAACGCCCGTCGTTTTACAACGTCGTG          |
| rpoS-lacZtlB | AGCTTGCATGC <u>CTGCAGTACATAATGGATTTCCTTAC</u>  |

### Construction of pBBR12-leuO and pBBR12-leuO-ara.

|                  |                                              |
|------------------|----------------------------------------------|
| leuO_comP_F_xhoI | <u>CTCGAGCGCTAATATTGACGAG</u>                |
| leuO_comP_R_kpnI | <u>GGTACCTTATACCGCAGCAACCAC</u>              |
| BAD-leuOF        | ATGTTAGATAAAA AAAGATGC                       |
| BAD-leuOB        | TTATACCGCAGCAACCACTTC                        |
| BBR12-bad-leuOF  | GCTTGATATCGA <u>AATTCGCAACGTTCAAATCCG</u>    |
| BBR12-bad-leuOB  | CGGGCTGCAGGA <u>AATTCGGCATGCATAATGTGCCTG</u> |

### Electrophoresis mobility shift assay

|                    |                       |
|--------------------|-----------------------|
| vh $\alpha$ -EMSAF | TGCCCTTGAAGAAATCCCTC  |
| vh $\alpha$ -EMSAB | TGCTTTCTCTGCGATAAAGTC |
| vh $\beta$ -EMSAF  | GAGTTTGACGCTAAAAAATAG |
| vh $\beta$ -EMSAB  | ATCTGCGTTTGCAGCGATTG  |

### Construction of RpoS

|            |                                                |
|------------|------------------------------------------------|
| rpoS-ndeI  | GCGCGGCAGCC <u>CATATGAGTATCAGCAACACAGTCACC</u> |
| rpoS-bamHI | GTTAGCAGCC <u>GGATCCTTTCTATTGGAGAATGCAAAT</u>  |

### qRT-PCR

#### *V. vulnificus*

|           |                      |
|-----------|----------------------|
| RpoS-RTF  | TTTGATGCCAGCAACAAGAG |
| RpoS-RTB  | TACTGTAACGGCGGGAAATC |
| clpX-qRTF | GCTGGTCCATCCGTTTACAT |

---

---

|                     |                          |
|---------------------|--------------------------|
| clpX-qRTB           | CCATCACTCGTTGTGTCACC     |
| rssB-qRTF           | GATCTTTCGCCGAATTACCA     |
| rssB-qRTB           | AACCACAATCAAAGGCAAGG     |
| dksA-qRTF           | AGGTGTGGAGCCATATCAGG     |
| dksA-qRTB           | GGTCAACTGGGTCAGGAAAA     |
| hfq-qrtF            | ATGGCTAAGGGGCAATCTCT     |
| hfq-qrtB            | GCTGTGGTGACTCACTGGAC     |
| hns-qrtF            | TGTTGAACATTCGCAGCCTA     |
| hns-qrtB            | TCTGCGATAGCCGCTAGTTT     |
| vvpE-RTF            | TGTCCAGGAGCCAGCAATTA     |
| vvpE-RTB            | ACCATCGCCAAATGTCATCG     |
| gabD-RTF            | CCCGTAGGCCAAACTGTTGAT    |
| gabD-RTB            | AACATAAAGGCGGTTTGCAC     |
| aldB-RTF            | ATTGCCAAACTGGCGTTTAC     |
| adlB-RTB            | GTACACACTTCGCCCTGGTT     |
| gapNAD-RTF          | CGTATCGGTCGTTTCGTTTT     |
| gapNAD-RTB          | TACGTCAACACCGATTGCAT     |
| <i>V. cholerae</i>  |                          |
| Vc_hu $\alpha$ -RTF | GCAGCTCTTGAAGCGACTCT     |
| Vc_hu $\alpha$ -RTB | AGCGCTTTACCTGCTACGAA     |
| Vc_hu $\beta$ -RTF  | AGAACAATTGCAGCGAACG      |
| Vc_hu $\beta$ -RTB  | TTCGCCAGTTTTTGGGTTAC     |
| Vc_rpoS-RTF         | GTGCGGTTGAGAAATTCGAT     |
| Vc_rpoS-RTB         | TGGTGTAGGTTTCGTGGTCAA    |
| Vc_leuO-RTF         | GGCGCGTTTAAAAGTGATGT     |
| Vc_leuO-RTB         | GAGGAGCAAAGCGTAAATCG     |
| Vc_gap-RTF          | TTTAAGAGCTTCGTTTGATTGGCC |
| Vc_gap-RTB          | TTTTTCTTGTGTTGTGCGAATGCG |

---

---

*V. parahaemolyticus*

|                     |                      |
|---------------------|----------------------|
| Vp_hu $\alpha$ -RTF | AGCTGCTCTTGAAGCGACTC |
| Vp_hu $\alpha$ -RTB | AGCGCTTTACC GCTACGAA |
| Vp_hu $\beta$ -RTF  | AATCGCAGAAAATGCAGACA |
| Vp_hu $\beta$ -RTB  | GCGATTTGGATTTCTTCACC |
| Vp_rpoS-RTF         | CCATTCGCTTGCCTATTCAT |
| Vp_rpoS-RTB         | CCACCAATTGGGGTATCAAC |
| Vp_leuO-RTF         | GCTGTGATGCAAGAGCAAAA |
| Vp_leuO-RTB         | ATAGGGCCAAACAGTTGACG |
| Vp_gap-RTF          | AGTGCAGGTTGAGGGAAATG |
| Vp_gap-RTB          | ACGCCCTGATCGAGATATTG |

---

<sup>a</sup> Nucleotides modified for the generation of restriction sites or for site-directed mutagenesis are underlined.

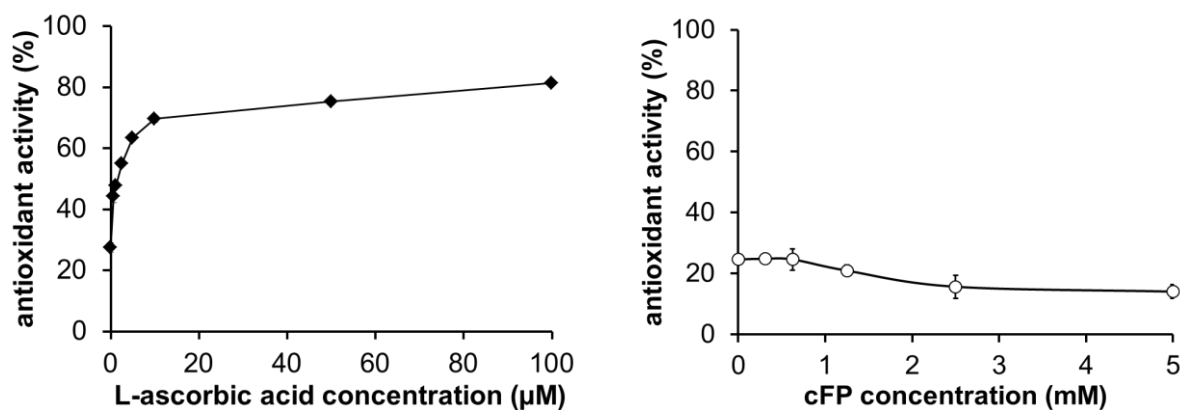

**Figure S1. cFP does not have scavenging activity of DPPH radical.** Scavenging activity of DPPH radical by various concentrations of L-ascorbic acid (positive control, left side) and cFP (0, 0.3125, 0.625, 1.25, 2.5, 5 mM, right side). Ascorbic acid solution and cFP solution was prepared in distilled water, and DMSO respectively. Anti-oxidant activity of cFP was measured by assessing the ability to scavenge 1,1-diphenyl-2-picrylhydrazyl (DPPH) as described previously (Brandwilliams et al., 1995. Food Sci Technol-Leb 28:25-30) with some modifications. Briefly, freshly prepared 100 µl of 30 µM DPPH in DMSO solution was thoroughly mixed with same volume of various concentrations of cFP (0, 0.3125, 0.625, 1.25, 2.5, 5 mM). Optical absorbance of the resultant mixtures were measured at 517 nm using a biophotometer (Eppendorf, Hamburg, Germany) after being incubated for 15 min at room temperature in dark condition. The percentage of scavenging activity was calculated as  $[1 - (A_i - A_j) / A_c] \times 100$  ( $A_i$ ,  $A_j$ , and  $A_c$  are  $A_{517}$  values of sample mixture, each cFP sample without DPPH, and control sample with only DPPH, respectively). Scavenging activity was calculated as described in Materials and Methods. Error bars denote standard deviation of three independent experimental data.
